# Supplementary material for: [18]Fluorodeoxyglucose Positron Emission Tomography for the Textural Features of Cervical Cancer Associated with Lymph Node Metastasis and Histological Type
Source: Springer Nature journal article supplement (doi:10.1007/s00259-017-3697-1), 2017-04-13
Supplement: MOESM4 [file 12222916]

## Sheet: 工作表1
Discretization		GLCM												GLRLM																						NGLDM										GLSZM
		Homogeneity		Energy		Correlation		Contrast		Entropy		Dissimilarity		SRE		LRE		LGRE	LGRE	HGRE	HGRE	SRLGE	SRLGE	SRHGE	SRHGE	LRLGE	LRLGE	LRHGE	LRHGE	GLNUr	GLNUr	RLNU	RLNU	RP	RP	Coarseness		Contrast		Busyness		Complexity		Strength	Strength	SZE		LZE	LZE
Method	Parameter	Az	Sig.	Az	Sig.	Az	Sig.	Az	Sig.	Az	Sig.	Az	Sig.	Az	Sig.	Az	Sig.	Az	Sig.	Az	Sig.	Az	Sig.	Az	Sig.	Az	Sig.	Az	Sig.	Az	Sig.	Az	Sig.	Az	Sig.	Az	Sig.	Az	Sig.	Az	Sig.	Az	Sig.	Az	Sig.	Az	Sig.	Az	Sig.
Fixed bin size	0.01	0.439	0.169	0.255	0	0.743	0	0.561	0.169	0.743	0	0.552	0.24	0.399	0.023	0.602	0.022	0.266	0	0.629	0.004	0.266	0	0.628	0.004	0.267	0	0.63	0.003	0.658	0	0.737	0	0.633	0.003	0.337209	0.000247037	0.33624	0.000226798	0.408223	0.0387895	0.548726	0.272598	0.625	0.00488628	0.455	0.315	0.549	0.271
Fixed bin size	0.025	0.451	0.274	0.247	0	0.742	0	0.561	0.169	0.747	0	0.552	0.24	0.412	0.048	0.591	0.041	0.291	0	0.628	0.004	0.291	0	0.627	0.004	0.293	0	0.632	0.003	0.665	0	0.738	0	0.629	0.004	0.286268	1.49217e-06	0.335963	0.000221307	0.460825	0.377753	0.52907	0.512777	0.579457	0.0736113	0.477	0.604	0.535	0.431
Fixed bin size	0.05	0.456	0.319	0.241	0	0.743	0	0.56	0.174	0.753	0	0.552	0.24	0.416	0.06	0.587	0.051	0.295	0	0.628	0.004	0.294	0	0.627	0.004	0.3	0	0.635	0.002	0.662	0	0.738	0	0.616	0.009	0.270072	2.25552e-07	0.330842	0.000139709	0.48948	0.812755	0.509275	0.834586	0.549419	0.265844	0.484	0.718	0.541	0.351
Fixed bin size	0.075	0.461	0.374	0.24	0	0.743	0	0.561	0.171	0.757	0	0.551	0.246	0.43	0.115	0.58	0.072	0.316	0	0.628	0.004	0.315	0	0.627	0.004	0.33	0	0.634	0.003	0.661	0	0.738	0	0.628	0.004	0.268549	1.87596e-07	0.332364	0.000160394	0.4982	0.96768	0.502215	0.960227	0.536268	0.414162	0.497	0.953	0.517	0.701
Fixed bin size	0.1	0.457	0.334	0.242	0	0.744	0	0.56	0.177	0.757	0	0.552	0.246	0.47	0.505	0.532	0.477	0.311	0	0.629	0.004	0.307	0	0.628	0.004	0.322	0	0.636	0.002	0.658	0	0.741	0	0.638	0.002	0.265642	1.31546e-07	0.328904	0.000117005	0.504707	0.915606	0.499723	0.995026	0.528378	0.522864	0.494	0.893	0.52	0.657
Fixed bin size	0.25	0.473	0.539	0.267	0	0.745	0	0.558	0.188	0.735	0	0.547	0.285	0.491	0.837	0.524	0.591	0.332	0	0.63	0.003	0.33	0	0.627	0.004	0.357	0.001	0.637	0.002	0.661	0	0.746	0	0.656	0	0.268272	1.81393e-07	0.329734	0.000126272	0.520903	0.637904	0.486711	0.76478	0.498893	0.980108	0.508	0.859	0.531	0.482
Fixed bin size	0.5	0.484	0.713	0.31	0	0.752	0	0.557	0.197	0.694	0	0.543	0.331	0.5	0.993	0.531	0.489	0.348	0.001	0.631	0.003	0.341	0	0.626	0.005	0.396	0.019	0.653	0.001	0.67	0	0.748	0	0.674	0	0.266473	1.45648e-07	0.320736	5.43222e-05	0.526993	0.543341	0.491694	0.851656	0.502215	0.960227	0.559	0.186	0.528	0.525
Fixed bin size	0.75	0.495	0.918	0.343	0	0.757	0	0.554	0.222	0.664	0	0.539	0.385	0.502	0.96	0.53	0.497	0.359	0.001	0.633	0.003	0.335	0	0.623	0.006	0.43	0.115	0.67	0	0.676	0	0.747	0	0.687	0	0.261628	8.00283e-08	0.327243	0.00010036	0.534745	0.434034	0.494048	0.893386	0.494463	0.900784	0.612	0.012	0.55	0.257
Fixed bin size	1	0.493	0.866	0.364	0.002	0.755	0	0.553	0.235	0.645	0.001	0.535	0.426	0.509	0.836	0.525	0.576	0.366	0.003	0.632	0.003	0.354	0.001	0.623	0.006	0.449	0.253	0.678	0	0.685	0	0.745	0	0.675	0	0.251523	2.21146e-08	0.32835	0.000111187	0.540421	0.362773	0.501523	0.97265	0.494463	0.900784	0.583	0.063	0.565	0.144
Fixed number of bins	4	0.751	0	0.65	0.001	0.723	0	0.254	0	0.364	0.002	0.248	0	0.292	0	0.755	0	0.562	0.164	0.381	0.007	0.362	0.002	0.333	0	0.735	0	0.657	0	0.732	0	0.692	0	0.688	0	0.27644	4.81426e-07	0.253322	2.79093e-08	0.736019	1.07198e-07	0.257337	4.66352e-08	0.294297	3.6301e-06	0.498	0.965	0.752	0
Fixed number of bins	8	0.747	0	0.516	0.725	0.734	0	0.258	0	0.498	0.963	0.256	0	0.277	0	0.746	0	0.542	0.347	0.371	0.004	0.472	0.527	0.334	0	0.667	0	0.566	0.138	0.741	0	0.719	0	0.704	0	0.271872	2.80015e-07	0.253184	2.74156e-08	0.736573	1.00097e-07	0.259413	6.063e-08	0.289037	2.03471e-06	0.415	0.055	0.743	0
Fixed number of bins	16	0.739	0	0.372	0.004	0.739	0	0.258	0	0.638	0.002	0.256	0	0.304	0	0.718	0	0.491	0.837	0.368	0.003	0.473	0.545	0.35	0.001	0.556	0.205	0.464	0.412	0.74	0	0.729	0	0.711	0	0.275055	4.0896e-07	0.253045	2.69305e-08	0.735188	1.1877e-07	0.259275	5.95824e-08	0.288621	1.94269e-06	0.283	0	0.73	0
Fixed number of bins	32	0.725	0	0.3	0	0.74	0	0.257	0	0.703	0	0.258	0	0.328	0	0.685	0	0.456	0.322	0.372	0.004	0.447	0.235	0.365	0.002	0.499	0.985	0.412	0.049	0.742	0	0.733	0	0.722	0	0.274779	3.95788e-07	0.254983	3.45484e-08	0.735327	1.1676e-07	0.25706	4.50244e-08	0.291251	2.60062e-06	0.292	0	0.698	0
Fixed number of bins	48	0.721	0	0.282	0	0.741	0	0.257	0	0.721	0	0.259	0	0.332	0	0.688	0	0.468	0.466	0.373	0.004	0.462	0.393	0.368	0.003	0.488	0.779	0.397	0.021	0.743	0	0.733	0	0.73	0	0.274	0	0.252	0	0.734	0	0.26	0	0.296	0	0.27	0	0.722	0
Fixed number of bins	64	0.714	0	0.277	0	0.743	0	0.257	0	0.726	0	0.259	0	0.332	0	0.666	0	0.455	0.31	0.372	0.004	0.449	0.251	0.369	0.003	0.48	0.647	0.39	0.013	0.742	0	0.735	0	0.73	0	0.278516	6.13812e-07	0.251107	2.09535e-08	0.735327	1.1676e-07	0.25969	6.2779e-08	0.296927	4.82422e-06	0.314	0	0.701	0
Fixed number of bins	80	0.722	0	0.275	0	0.743	0	0.256	0	0.728	0	0.259	0	0.288	0	0.719	0	0.44	0.175	0.373	0.004	0.436	0.151	0.368	0.003	0.459	0.356	0.392	0.015	0.746	0	0.734	0	0.725	0	0.274	0	0.251	0	0.737	0	0.262	0	0.298	0	0.288	0	0.719	0
Fixed number of bins	96	0.715	0	0.269	0	0.742	0	0.256	0	0.734	0	0.26	0	0.299	0	0.71	0	0.429	0.109	0.373	0.004	0.426	0.095	0.368	0.003	0.441	0.182	0.392	0.015	0.741	0	0.735	0	0.728	0	0.281	0	0.254	0	0.733	0	0.262	0	0.3	0	0.275	0	0.718	0
Fixed number of bins	112	0.704	0	0.266	0	0.742	0	0.256	0	0.735	0	0.26	0	0.303	0	0.699	0	0.417	0.061	0.372	0.004	0.415	0.057	0.369	0.003	0.423	0.083	0.387	0.011	0.744	0	0.735	0	0.722	0	0.286	0	0.255	0	0.731	0	0.259	0	0.299	0	0.299	0	0.71	0
Fixed number of bins	128	0.703	0	0.268	0	0.743	0	0.257	0	0.733	0	0.26	0	0.309	0	0.693	0	0.415	0.056	0.372	0.004	0.413	0.051	0.368	0.003	0.422	0.08	0.388	0.012	0.744	0	0.736	0	0.725	0	0.292636	3.02802e-06	0.256368	4.12297e-08	0.732558	1.63951e-07	0.258583	5.4602e-08	0.298311	5.59554e-06	0.3	0	0.703	0
[truncated: 18 more columns]
